# Supplementary material
Source: publisher figshare collection journal article supplement (https://sage.figshare.com/ndownloader/files/17059415)
Supplement: Supplementary file 1 [file 17059415]

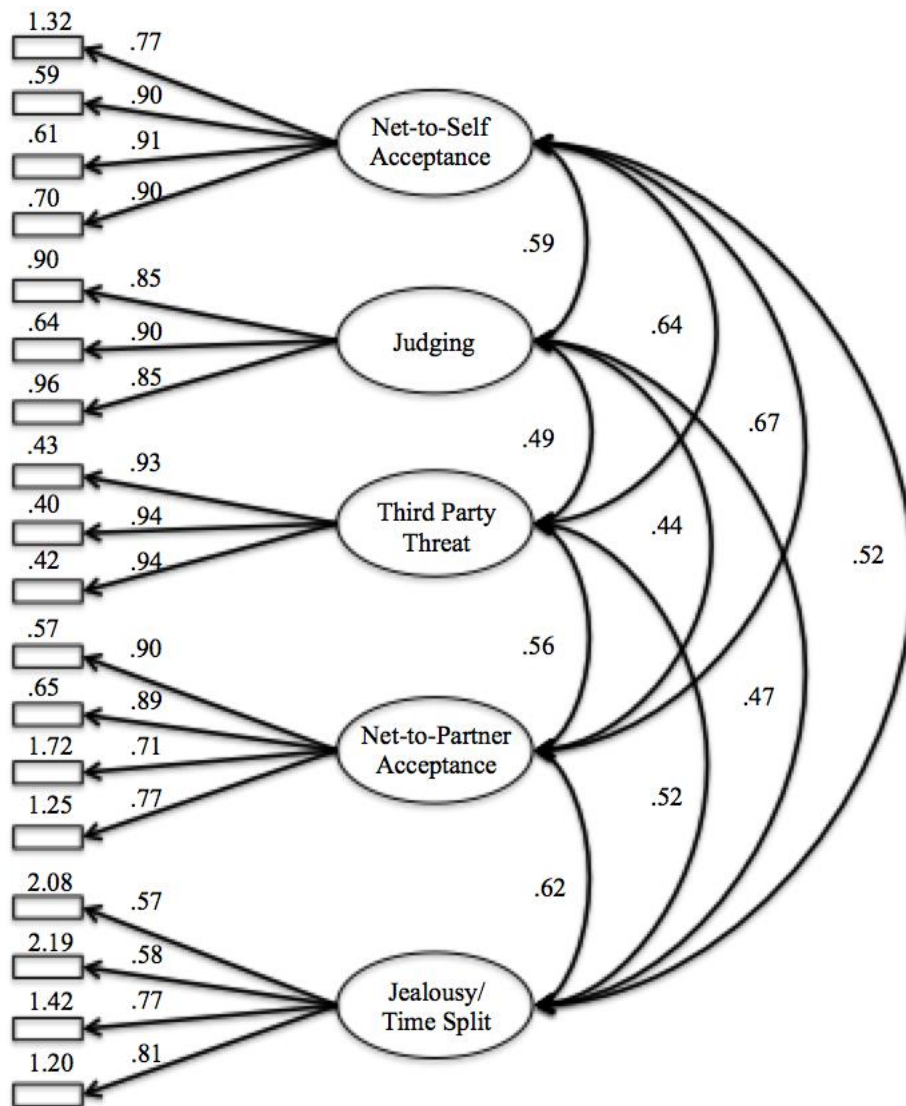

Figure 1 – Study 4 Confirmatory factor analysis for measures of network uncertainty

Note.  $\chi^2 = (123) = 359.72$ ,  $\chi^2/df = 2.93$ ; CFI = .96; RMSEA = .073; and SRMR = .049. All correlations are standardized and were significant at the critical  $\alpha$  of .001. Numbers above boxes are error values. In this model, after consultation of modification indices, covariations were drawn between items 11/12, 15/16, and 16/18.
